# Supplementary material for: Pathogenicity Analysis of a Novel Variant in GTPBP3 Causing Mitochondrial Disease and Systematic Literature Review
Source: MDPI journal article supplement (doi:10.3390/genes14030552), 2023-02-22
Supplement: s1 [file s1]

## Supplemental Figures and Tables

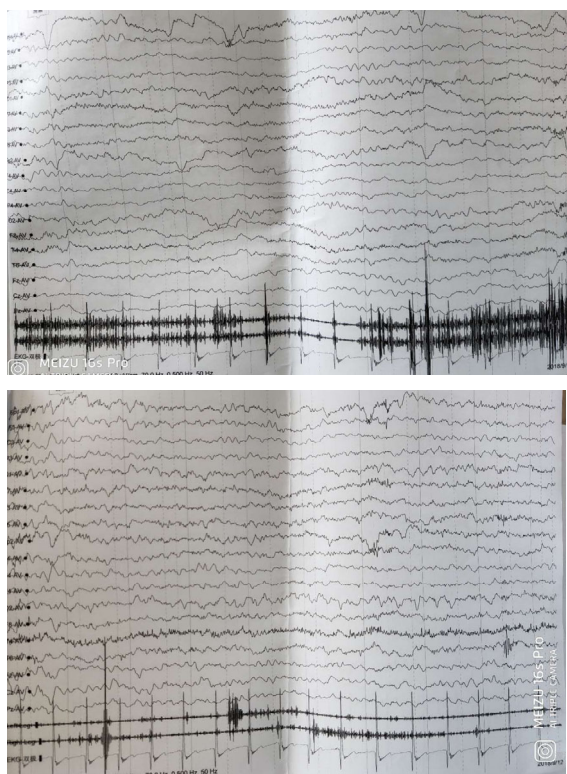

**Figure S1.** Electroencephalogram (EEG) of patient at six years old.

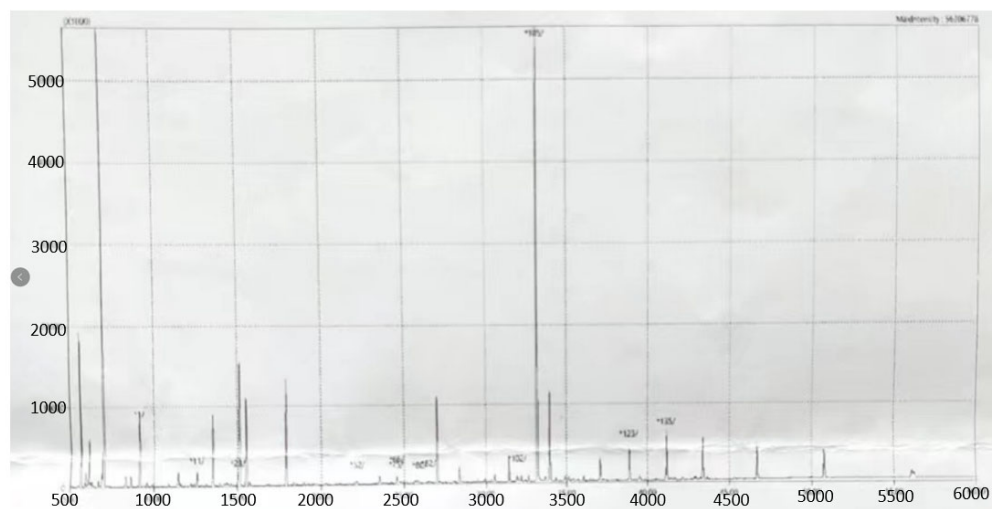

**Figure S2.** Chromatogram for the organic acids at three year of age.

**Table S1.** Clinical and genetic characteristics of patients carrying GTPBP3 variants.

| Patient ID            | Mutation type | Exon/<br>Intron | cDNA             | Protein level                      | Inheritance | Gender | AO      | Outcomes;<br>cause of death                             | TTE                  | Brain MRI                              | Plasma lactate  | Other phenotypes                                                        | Reference                   |
|-----------------------|---------------|-----------------|------------------|------------------------------------|-------------|--------|---------|---------------------------------------------------------|----------------------|----------------------------------------|-----------------|-------------------------------------------------------------------------|-----------------------------|
| Severe type           |               |                 |                  |                                    |             |        |         |                                                         |                      |                                        |                 |                                                                         |                             |
| #83904 <sup>*,a</sup> | homozygote    | Exon 1          | c.32_33delinsGTG | p.Gln11Argfs*98                    | UNK         | F      | 1 week  | died 9 months;<br>cardiac insufficiency with arrhythmia | DCM                  | UNK                                    | 20 mmol/L<br>↑  | WPW; cardiogenic shock; metabolic acidosis                              | Kopajtich et al. (2014) [3] |
| #83905 <sup>*,a</sup> | homozygote    | Exon 1          | c.32_33delinsGTG | p.Gln11Argfs*98                    | UNK         | F      | birth   | died 10 days;<br>cardiac insufficiency                  | DCM                  | UNK                                    | UNK             | WPW; cardiogenic shock; metabolic acidosis                              | Kopajtich et al. (2014) [3] |
| #81471                | homozygote    | Exon 4          | c.424G>A         | p.Glu142Lys                        | UNK         | M      | 4 weeks | died 5 weeks;<br>acidosis                               | HCM (concentric LVH) | hyperintensities in subthalamic nuclei | 11 mmol/L<br>↑  | weight loss; hypothermia; jaundice; recurrent apnea; metabolic acidosis | Kopajtich et al. (2014) [3] |
| #76671                | homozygote    | Intron 5        | c.665-2delA      | p.Ala222Gly;<br>p.Asp223_Ser270del | UNK         | M      | birth   | died 10 months; CHF                                     | HCM (RVH)            | bilateral hyperintensities in thalamus | 5.2 mmol/L<br>↑ | WPW; hypotonia; FTT; metabolic acidosis                                 | Kopajtich et al. (2014) [3] |
| #75191                | homozygote    | Exon 8          | c.1009G>C        | p.Asp337His                        | UNK         | F      | birth   | died 1 day;<br>asystolia                                | HCM (apical RVH)     | UNK                                    | 23 mmol/L<br>↑  | Kussmaul breathing; stridor; hyporeactivit; poor feeding; hypotonia;    | Kopajtich et al. (2014) [3] |

|        |                       |        |              |                  |          |   |            |                    |        |     |        |                                                            |                             |
|--------|-----------------------|--------|--------------|------------------|----------|---|------------|--------------------|--------|-----|--------|------------------------------------------------------------|-----------------------------|
|        |                       |        |              |                  |          |   |            |                    |        |     |        | bradycardia                                                |                             |
| #1     | Compound heterozygote | Exon 4 | c.413C>T     | p.Ala138Val      | paternal | M | 17 h       | died 5 days; CHF   | normal | UNK | 26     | hypothermia; stridor; hyporeactivit;                       | Yan HM et al. (2021) [4]    |
|        |                       | Exon 4 | c.509_510del | p.Gln170Glyfs*42 | maternal |   |            |                    |        |     | ↑      | respiratory failure; cardiogenic shock; metabolic acidosis |                             |
| #72425 | Compound heterozygote | Exon 4 | c.484G>C     | p.Ala162Pro      | maternal | F | 3.5 months | died 8 months; CHF | DCM    | UNK | 23.3   | poor feeding; FTT; hyporeactivity                          | Kopajtich et al. (2014) [3] |
|        |                       | Exon 6 | c.673G>A     | p.Glu225Lys      | paternal |   |            |                    |        |     | mmol/L |                                                            |                             |
|        |                       | Exon 7 | c.964G>C     | p.Ala322Pro      | paternal |   |            |                    |        |     | ↑      |                                                            |                             |

Mild type

|               |                       |        |          |             |     |   |         |                |        |                            |         |                                                                                   |        |                                                                  |                             |
|---------------|-----------------------|--------|----------|-------------|-----|---|---------|----------------|--------|----------------------------|---------|-----------------------------------------------------------------------------------|--------|------------------------------------------------------------------|-----------------------------|
|               |                       |        |          |             |     |   |         |                |        |                            |         | bilateral hyperintensities in thalamus and extending to the mesencephalon         | >10    | developmental delay; epileptic seizures; intellectual disability | Kopajtich et al. (2014) [3] |
| #75168*       | homozygote            | Exon 6 | c.770C>A | p.Pro257His | UNK | F | 2 years | alive 5 years  | UNK    |                            |         |                                                                                   | ↑      |                                                                  |                             |
| Patient No.24 | homozygote            | Exon 7 | c.836C>T | p.Pro279Leu | UNK | F | 3 weeks | alive 10 years | normal | Delayed myelination        | UNK     | Mental motor retardation; epileptic seizure; hearing disability; thrombocytopenia |        |                                                                  | Eimas et al. (2019) [13]    |
| #82790        | Compound heterozygote | Exon 1 | c.8G>T   | p.Arg3Leu   | UNK | F | 1 year  | alive 2 years  | normal | bilateral hyperintensities | 5.7~6.5 | developmental delay; epileptic seizures;                                          | mmol/L |                                                                  | Kopajtich et al.            |

|             |                       |        |              |                    |          |   |         |                |           |                                                                                |                       |                                                                               |                             |
|-------------|-----------------------|--------|--------------|--------------------|----------|---|---------|----------------|-----------|--------------------------------------------------------------------------------|-----------------------|-------------------------------------------------------------------------------|-----------------------------|
|             |                       |        |              |                    |          |   |         |                |           | in the putamen and weakly also in the anterior thalamus                        | ↑                     | hypotonia                                                                     | (2014) [3]                  |
|             |                       | Exon 7 | c.934_957del | p.Gly312_Val319del | UNK      |   |         |                |           |                                                                                |                       |                                                                               |                             |
| #3          | Compound heterozygote | Exon 4 | c.424G>A     | p.Glu142Lys        | maternal | F | 1 year  | alive 3 years  | HCM (LVH) | in brain stem, thalamus and dentate body of the cerebellum                     | 4.26~16 mmol/L        | developmental delay; intellectual disability; fatigability                    | Yan HM et al. (2021) [4]    |
| #66143      | Compound heterozygote | Exon 4 | c.476A>T     | p.Glu159Val        | UNK      | M | 2 years | alive 5 years  | HCM       | UNK                                                                            | UNK (lactic acidosis) | sudden respiratory failure; CHF                                               | Kopajtich et al. (2014) [3] |
|             |                       | Exon 7 | c.964G>C     | p.Ala322Pro        | UNK      |   |         |                |           |                                                                                |                       |                                                                               |                             |
| #2          | Compound heterozygote | Exon 4 | c.544G>T     | p.Gly182*          | paternal | F | 1 year  | alive 3 years  | UNK       | bilateral lesions in the midbrain, thalamus and dentate body of the cerebellum | 7.7~14 mmol/L         | developmental delay; hypotonia                                                | Yan HM et al. (2021) [4]    |
|             |                       | Exon 5 | c.689A>C     | p.Gln230Pro        | maternal |   |         |                |           |                                                                                | ↑                     |                                                                               |                             |
| #C1         | Compound heterozygote | Exon 5 | c.689A>C     | p.Gln230Pro        | maternal | F | 3 years | alive 3 years  | HCM (LVH) | abnormal symmetry signal of bilateral cortical spinal tract                    | 29 mmol/L             | respiratory failure; myocardial damage; stroke-like syndrome                  | Yang Q et al. (2021) [15]   |
|             |                       | Exon 8 | c.1073delG   | p.Gly358Glufs*16   | paternal |   |         |                |           |                                                                                | ↑                     |                                                                               |                             |
| Our Patient | Compound heterozygote | Exon 5 | c.689A>C     | p.Gln230Pro        | paternal | M | 3 days  | alive 10 years | HCM (LVH) | abnormal signal of bilateral thalamus                                          | 3-11.6 mmol/L         | mental and motor retardation; self-limitd epileptic seizures; abnormal visual | Our Patient                 |
|             |                       | Exon 7 | c.1102dupC   | p.Arg368Profs*22   | maternal |   |         |                |           |                                                                                | ↑                     |                                                                               |                             |

|                       |                       |        |            |                  |          |   |          |                |           |                                                 |        | development                                 |                             |
|-----------------------|-----------------------|--------|------------|------------------|----------|---|----------|----------------|-----------|-------------------------------------------------|--------|---------------------------------------------|-----------------------------|
| #C2                   | Compound heterozygote | Exon 5 | c.689A>C   | p.Gln230Pro      | paternal | F | 9 years  | alive 17 years | HCM (LVH) | UNK                                             | 5.53   | heart failure;                              | Zhao XX et al. (2021) [14]  |
|                       |                       | Exon 9 | c.1280delC | p.Pro427Argfs*3  | maternal |   |          |                |           |                                                 | mmol/L | developmental delay;                        |                             |
|                       |                       |        |            |                  |          |   |          |                |           |                                                 | ↑      | abdominal pain;                             |                             |
| #49665 <sup>*,b</sup> | Compound heterozygote | Exon 9 | c.1291dupC | p.Pro431Argfs*87 | UNK      | M | 10 years | alive 14 years | HCM (LVH) | Lactate peaks in parietal and precentral cortex | 3~7    | mild intellectual disability; fatigability; | Kopajtich et al. (2014) [3] |
|                       |                       | Exon 9 | c.1375G>A  | p.Glu459Lys      | UNK      |   |          |                |           |                                                 | mmol/L | limited vision; slight                      |                             |
|                       |                       |        |            |                  |          |   |          |                |           |                                                 | ↑      | dyspnea with climbing stairs                |                             |
| #36349 <sup>*,b</sup> | Compound heterozygote | Exon 9 | c.1291dupC | p.Pro431Argfs*87 | UNK      | M | UNK      | alive 17 years | HCM       | Lactate peaks in parietal and precentral cortex | UNK    | mild intellectual disability; fatigability; | Kopajtich et al. (2014) [3] |
|                       |                       | Exon 9 | c.1375G>A  | p.Glu459Lys      | UNK      |   |          |                |           |                                                 | UNK    | limited vision; slight                      |                             |
|                       |                       |        |            |                  |          |   |          |                |           |                                                 |        | dyspnea with climbing stairs                |                             |

Abbreviations are as follows: AO, age of onset; TTE, transthoracic echocardiography; MRI, magnetic resonance imaging; UNK, unknown; CHF, congestive heart failure; DCM, dilated cardiomyopathy; HCM, hypertrophic cardiomyopathy; LVH/RVH, left/right ventricular hypertrophy; WPW, Wolff-Par-kinson-White syndrome; FTT, failure to thrive.

NCBI reference sequence: NM\_032620.4.

<sup>a</sup>They have consanguineous parents.

<sup>a,b</sup>These individuals are siblings.

**Table S2.** Distribution of homozygous missense variant in coding region of *GTPBP3* from COXPD23 patients and gnomAD across five structural domains.

| DOMAIN                      |                            | GENERAL<br>POPULATIONS<br>(HOMO) | CLINICAL<br>SAMPLES<br>(HOMO) |
|-----------------------------|----------------------------|----------------------------------|-------------------------------|
| TRANSPORT<br>PEPTIDE REGION | Number within this domain  | 57115                            | 0                             |
|                             | Number outside this domain | 66324                            | 4                             |
|                             | Fisher's test              |                                  | 0.1292                        |
| N-TERMINAL<br>REGION        | Number within this domain  | 121670                           | 1                             |
|                             | Number outside this domain | 1769                             | 3                             |
|                             | Fisher's test              |                                  | <0.0001****                   |
| CENTRAL HELICAL<br>DOMAIN 1 | Number within this domain  | 1                                | 0                             |
|                             | Number outside this domain | 123438                           | 4                             |
|                             | Fisher's test              |                                  | >0.9999                       |
| TRME-TYPE G<br>DOMAIN       | Number within this domain  | 1768                             | 3                             |
|                             | Number outside this domain | 121671                           | 1                             |
|                             | Fisher's test              |                                  | <0.0001****                   |
| CENTRAL HELICAL<br>DOMAIN 2 | Number within this domain  | 1714                             | 0                             |
|                             | Number outside this domain | 121725                           | 4                             |
|                             | Fisher's test              |                                  | >0.9999                       |

**Table S3.** Distribution of variants in GTPBP3 from severe types and mild types across five structural domains.

| Domain                   |                            | Total        |            | LOFVs        |            | Missense variants |            |
|--------------------------|----------------------------|--------------|------------|--------------|------------|-------------------|------------|
|                          |                            | severe types | mild types | severe types | mild types | severe types      | mild types |
| Transport peptide region | Number within this domain  | 1            | 1          | 1            | 0          | 0                 | 1          |
|                          | Number outside this domain | 8            | 13         | 2            | 5          | 6                 | 8          |
|                          | Fisher's test              | >0.9999      |            | 0.3750       |            | >0.9999           |            |
| N-terminal region        | Number within this domain  | 2            | 3          | 0            | 0          | 2                 | 3          |
|                          | Number outside this domain | 7            | 11         | 3            | 5          | 4                 | 6          |
|                          | Fisher's test              | >0.9999      |            | >0.9999      |            | >0.9999           |            |
| Central helical domain 1 | Number within this domain  | 3            | 4          | 1            | 2          | 2                 | 2          |
|                          | Number outside this domain | 6            | 10         | 2            | 3          | 4                 | 7          |
|                          | Fisher's test              | >0.9999      |            | >0.9999      |            | >0.9999           |            |
| TrmE-type G domain       | Number within this domain  | 4            | 3          | 2            | 1          | 2                 | 2          |
|                          | Number outside this domain | 5            | 11         | 1            | 4          | 4                 | 7          |
|                          | Fisher's test              | 0.3630       |            | 0.4643       |            | >0.9999           |            |
| Central helical domain 2 | Number within this domain  | 0            | 3          | 0            | 2          | 0                 | 1          |
|                          | Number outside this domain | 9            | 11         | 3            | 3          | 6                 | 8          |
|                          | Fisher's test              | 0.2530       |            | 0.4643       |            | >0.9999           |            |
